# Supplementary material
Source: publisher site journal article supplement (https://www.dovepress.com/article/493159)
Supplement: Supplementary file 1 [file get_supplementary_file.php]

**Supplementary Table 1**

The Information of Healthcare Interviewee.

| ID | Sex | Age  (year) | Professional title | Educational background | Length of service（year） |
| --- | --- | --- | --- | --- | --- |
| D1 | Male | 39 | Associate chief surgeon | Doctor | 13 |
| D2 | Male | 41 | Associate chief surgeon | Master | 10 |
| D3 | Male | 41 | Associate chief p surgeon | Master | 17 |
| D4 | Male | 50 | Chief surgeon | Doctor | 24 |
| D5 | Male | 38 | Attending surgeon | Doctor | 12 |
| D6 | Male | 52 | Chief surgeon | Master | 26 |
| D7 | Male | 36 | Attending surgeon | Doctor | 10 |
| D8 | Male | 35 | Attending surgeon | Doctor | 10 |
| D9 | Male | 34 | Attending surgeon | Master | 10 |
| D10 | Male | 35 | Attending surgeon | Master | 11 |
| N1 | Female | 50 | Chief nurse | Bachelor | 30 |
| N2 | Female | 57 | Chief nurse | Bachelor | 39 |
| N3 | Female | 33 | Chief nurse | Bachelor | 10 |
| N4 | Female | 37 | Deputy chief nurse | Bachelor | 16 |
| N5 | Female | 35 | Chief nurse | Bachelor | 12 |
| N6 | Female | 34 | Chief nurse | Bachelor | 14 |
| N7 | Female | 32 | Nurse | Bachelor | 10 |
| N8 | Female | 33 | Nurse | Bachelor | 10 |
| N9 | Female | 34 | Nurse | Bachelor | 10 |
| N10 | Female | 48 | Deputy chief nurse | Bachelor | 29 |
| N11 | Female | 49 | Deputy chief nurse | Bachelor | 29 |

**Supplementary Table 2**

The Information of Patient Interviewee.

| ID | Sex | Age  (year) | Educational background | Length of diseases（month） |
| --- | --- | --- | --- | --- |
| H1 | Male | 62 | Primary school | 12 |
| H2 | Male | 70 | Illiteracy | 10 |
| H3 | Female | 75 | Bachelor | 10 |
| H4 | Male | 67 | Bachelor | 8 |
| H5 | Female | 57 | Middle school | 8 |
| H6 | Male | 59 | Primary school | 4 |
| H7 | Male | 68 | Illiteracy | 10 |
| H8 | Male | 80 | Middle school | 17 |
| H9 | Female | 69 | High school | 12 |
| H10 | Male | 71 | Primary school | 10 |
| H11 | Male | 73 | Primary school | 5 |

**Supplementary Table 3**

Self-management Themes Extracted from Semi-structured Interviews.

| **Theme 1: Protection motivation is the driving force behind self-management** |
| --- |
| 1-1 Fear of pain |
| 1-2 Fear of adverse outcomes |
| 1-3 Insecurity in future life |
| 1-4 Worry about high medical costs |
| 1-5 Lifelong of disease and long-term self-management |
| **Theme 2: Multiple tasks form the core of self-management** |
| 2-1 Setting management goals |
| 2-2 Medical management |
| 2-3 Rehabilitation exercise management |
| 2-4 Life style management |
| 2-5 Foot care |
| 2-6 Pain management |
| 2-7 Emotional management |
| 2-8 Gaining support |
| **Theme 3: Healthcare provider-patient cooperation is the cornerstone of self-management** |
| 3-1 Self-management always was neglected |
| 3-2 The need of knowledge and skills of self-management cannot be met |
| 3-3 Long-term partnership between doctors, nurses and patients is needed |
| 3-4 Management support for multidisciplinary collaboration is needed |
| **Theme 4: Improvement of the quality of life is the goal of self-management** |
| 4-1 It is necessary to balance the disease and daily life |
| 4-2 Self-management need support instead of blame |
| 4-3 Patients should accept reality and restoring confidence to handle disease |

**Supplementary Table 4**

The Characteristics of Delphi Experts.

| Characteristics | n | % | Characteristics | n | % |
| --- | --- | --- | --- | --- | --- |
| **Age** |  |  | **Tutor** |  |  |
| 30~39 | 6 | 20.7 | Tutor of PhD | 2 | 6.9 |
| 40~49 | 17 | 58.6 | Tutor of MD | 11 | 37.9 |
| 50~59 | 6 | 20.7 | None | 16 | 55.2 |
| **Sex** |  |  | **Institution** |  |  |
| Male | 12 | 41.4 | Hospital | 25 | 86.2 |
| Female | 17 | 58.6 | University | 4 | 13.8 |
| **Education background** |  |  | **Style of expert** |  |  |
| Doctor | 9 | 31.0 | Vascular nurse | 13 | 44.8 |
| Master | 8 | 27.6 | Vascular surgeon | 12 | 41.4 |
| Bachelor | 12 | 41.4 | Self-management expert | 2 | 6.9 |
| **Professional title** |  |  | Psychometric expert | 1 | 3.4 |
| Professor | 7 | 24.1 |  |  |  |
| Associate professor | 18 | 62.1 |  |  |  |
| Other | 4 | 13.8 |  |  |  |

**Supplementary Table 5**

The Positive Coefficient and Authority Coefficient of Two Round of Delphi Expert Consultation.

| Round | Positive Coefficient | | | |  | Authority Coefficient | | |
| --- | --- | --- | --- | --- | --- | --- | --- | --- |
| Send experts | Response  experts | Effective response rate（%） | Received  comments |  | Familiarity coefficient  （Cs） | Judgment coefficient（Ca） | Authority coefficient（Cr） |
| First | 32 | 29 | 90.6 | 81 |  | 0.910 | 0.986 | 0.948 |
| Second | 29 | 29 | 100.0 | 22 |  | 0.937 | 0.955 | 0.946 |

**Supplementary Table 6**

The score of Each Item of the first Round of Delphi Expert Consultation.

| Item | Mean | SD | Median | IQR | 4  （%） | ≥3  （%） | CV |
| --- | --- | --- | --- | --- | --- | --- | --- |
| 1 | 3.793 | 0.620 | 4 | 0 | 86.2 | 96.6 | 0.163 |
| 2 | 3.931 | 0.258 | 4 | 0 | 93.1 | 100.0 | 0.066 |
| 3 | 3.690 | 0.660 | 4 | 1 | 75.9 | 96.6 | 0.179 |
| 4 | 3.690 | 0.712 | 4 | 0 | 79.3 | 93.1 | 0.193 |
| 5 | 4.000 | 0.000 | 4 | 0 | 100.0 | 100.0 | 0.000 |
| 6 | 3.862 | 0.581 | 4 | 0 | 93.1 | 96.6 | 0.150 |
| 7 | 3.724 | 0.702 | 4 | 0 | 82.8 | 93.1 | 0.189 |
| 8 | 3.931 | 0.258 | 4 | 0 | 93.1 | 100.0 | 0.066 |
| 9 | 3.793 | 0.620 | 4 | 0 | 86.2 | 96.6 | 0.163 |
| 10 | 3.828 | 0.384 | 4 | 0 | 82.8 | 100.0 | 0.100 |
| 11 | 3.621 | 0.942 | 4 | 0 | 82.8 | 89.7 | 0.260 |
| 12 | 3.828 | 0.468 | 4 | 0 | 86.2 | 96.6 | 0.122 |
| 13 | 3.759 | 0.511 | 4 | 0 | 79.3 | 96.6 | 0.136 |
| 14 | 3.897 | 0.409 | 4 | 0 | 93.1 | 96.6 | 0.105 |
| 15 | 3.862 | 0.351 | 4 | 0 | 86.2 | 100.0 | 0.091 |
| 16 | 3.828 | 0.602 | 4 | 0 | 89.7 | 96.6 | 0.157 |
| 17 | 4.000 | 0.000 | 4 | 0 | 100.0 | 100.0 | 0.000 |
| 18 | 3.793 | 0.491 | 4 | 0 | 82.8 | 96.6 | 0.129 |
| 19 | 3.517 | 0.785 | 4 | 1 | 65.5 | 89.7 | 0.223 |
| 20 | 3.517 | 0.688 | 4 | 1 | 62.1 | 93.1 | 0.196 |
| 21 | 3.759 | 0.511 | 4 | 0 | 79.3 | 96.6 | 0.136 |
| 22 | 3.862 | 0.351 | 4 | 0 | 86.2 | 100.0 | 0.091 |
| 23 | 3.517 | 0.829 | 4 | 1 | 65.5 | 93.1 | 0.236 |
| 24 | 3.655 | 0.553 | 4 | 1 | 69.0 | 96.6 | 0.151 |
| 25 | 3.828 | 0.384 | 4 | 0 | 82.8 | 100.0 | 0.100 |
| 26 | 3.724 | 0.528 | 4 | 1 | 75.9 | 93.1 | 0.142 |
| 27 | 3.793 | 0.491 | 4 | 0 | 82.8 | 96.6 | 0.129 |
| 28 | 3.724 | 0.528 | 4 | 1 | 75.9 | 96.6 | 0.142 |
| 29 | 3.483 | 0.785 | 4 | 1 | 62.1 | 89.7 | 0.225 |
| 30 | 3.414 | 0.907 | 4 | 1 | 62.1 | 86.2 | 0.266 |
| 31 | 3.724 | 0.702 | 4 | 0 | 82.8 | 93.1 | 0.189 |
| 32 | 4.000 | 0.000 | 4 | 0 | 100.0 | 100.0 | 0.000 |
| 33 | 3.552 | 0.870 | 4 | 1 | 72.4 | 89.7 | 0.245 |
| 34 | 3.586 | 0.946 | 4 | 0 | 79.3 | 89.7 | 0.264 |
| 35 | 3.897 | 0.409 | 4 | 0 | 93.1 | 96.6 | 0.105 |
| 36 | 3.552 | 0.870 | 4 | 1 | 72.4 | 89.7 | 0.245 |
| 37 | 3.069 | 1.132 | 3 | 2 | 48.3 | 75.9 | 0.369 |
| 38 | 3.241 | 1.091 | 4 | 1 | 58.6 | 79.3 | 0.337 |
| 39 | 3.483 | 0.871 | 4 | 1 | 65.5 | 89.7 | 0.250 |
| 40 | 3.793 | 0.491 | 4 | 0 | 82.8 | 96.6 | 0.129 |
| 41 | 3.931 | 0.258 | 4 | 0 | 93.1 | 100.0 | 0.066 |
| 42 | 3.483 | 0.871 | 4 | 1 | 65.5 | 89.7 | 0.250 |
| 43 | 3.759 | 0.435 | 4 | 1 | 75.9 | 100.0 | 0.116 |

Footnote: SD refers standard deviation; IQR refers interquartile range; CV refers coefficient of variance

**Supplementary Table 7**

The Score of Each Item of the Second Round of Delphi Expert Consultation.

| Item | Mean | SD | Median | IQR | 4  （%） | ≥3  （%） | CV |
| --- | --- | --- | --- | --- | --- | --- | --- |
| 1 | 3.759 | 0.577 | 4 | 0 | 82.8 | 93.1 | 0.153 |
| 2 | 3.759 | 0.511 | 4 | 0 | 79.3 | 96.6 | 0.136 |
| 3 | 3.793 | 0.412 | 4 | 0 | 79.3 | 100.0 | 0.109 |
| 4 | 3.966 | 0.186 | 4 | 0 | 96.6 | 100.0 | 0.047 |
| 5 | 3.931 | 0.258 | 4 | 0 | 93.1 | 100.0 | 0.066 |
| 6 | 3.759 | 0.511 | 4 | 0 | 79.3 | 93.1 | 0.136 |
| 7 | 3.759 | 0.689 | 4 | 0 | 86.2 | 93.1 | 0.183 |
| 8 | 3.931 | 0.371 | 4 | 0 | 96.6 | 96.6 | 0.094 |
| 9 | 3.793 | 0.412 | 4 | 0 | 79.3 | 100.0 | 0.109 |
| 10 | 3.655 | 0.670 | 4 | 0.5 | 75.9 | 89.7 | 0.183 |
| 11 | 3.793 | 0.491 | 4 | 0 | 82.8 | 96.6 | 0.130 |
| 12 | 3.862 | 0.351 | 4 | 0 | 86.2 | 100.0 | 0.091 |
| 13 | 3.690 | 0.541 | 4 | 0 | 72.4 | 96.6 | 0.147 |
| 14 | 3.552 | 0.632 | 4 | 1 | 62.1 | 93.1 | 0.178 |
| 15 | 3.655 | 0.614 | 4 | 1 | 72.4 | 93.1 | 0.168 |
| 16 | 3.483 | 0.634 | 4 | 1 | 55.2 | 93.1 | 0.182 |
| 17 | 3.448 | 0.686 | 4 | 1 | 55.2 | 89.7 | 0.199 |
| 18 | 3.345 | 0.769 | 4 | 1 | 48.3 | 89.7 | 0.230 |
| 19 | 3.586 | 0.682 | 4 | 1 | 69.0 | 89.7 | 0.190 |
| 20 | 3.724 | 0.528 | 4 | 0.5 | 75.9 | 96.6 | 0.142 |
| 21 | 3.552 | 0.632 | 4 | 1 | 62.1 | 93.1 | 0.178 |
| 22 | 3.690 | 0.541 | 4 | 1 | 72.4 | 96.6 | 0.147 |
| 23 | 3.414 | 0.780 | 4 | 1 | 58.6 | 82.8 | 0.228 |
| 24 | 3.379 | 0.775 | 4 | 1 | 55.2 | 82.8 | 0.229 |
| 25 | 3.483 | 0.738 | 4 | 1 | 62.1 | 86.2 | 0.212 |
| 26 | 3.483 | 0.738 | 4 | 1 | 62.1 | 86.2 | 0.212 |

Footnote: SD refers standard deviation; IQR refers interquartile range; CV refers coefficient of variance

**Supplementary Table 8**

The Results of Correlation Coefficient Analysis, Dispersion Degree Analysis and Cronbach's α Coefficient Method（n=271）.

| Item | Mean | SD | Correlation coefficient（*r*） | Cronbach’ α of item deleted |
| --- | --- | --- | --- | --- |
| 1 | 1.926 | 0.866 | 0.855*** | 0.981 |
| 2 | 1.915 | 0.854 | 0.866*** | 0.980 |
| 3 | 1.971 | 0.798 | 0.824*** | 0.981 |
| 4 | 2.277 | 0.865 | 0.760*** | 0.981 |
| 5 | 1.801 | 1.042 | 0.802*** | 0.981 |
| 6 | 2.114 | 0.918 | 0.827*** | 0.981 |
| 7 | 1.878 | 0.905 | 0.869*** | 0.980 |
| 8 | 1.779 | 0.952 | 0.888*** | 0.980 |
| 9 | 1.760 | 0.946 | 0.892*** | 0.980 |
| 10 | 2.111 | 0.800 | 0.845*** | 0.981 |
| 11 | 2.199 | 0.768 | 0.712*** | 0.981 |
| 12 | 2.225 | 0.885 | 0.597*** | 0.982 |
| 13 | 2.122 | 0.800 | 0.716*** | 0.981 |
| 14 | 1.982 | 0.875 | 0.849*** | 0.981 |
| 15 | 1.919 | 0.895 | 0.847*** | 0.981 |
| 16 | 2.092 | 0.832 | 0.848*** | 0.981 |
| 17 | 2.111 | 0.804 | 0.846*** | 0.981 |
| 18 | 1.875 | 0.902 | 0.847*** | 0.981 |
| 19 | 1.653 | 0.918 | 0.869*** | 0.980 |
| 20 | 1.782 | 0.947 | 0.833*** | 0.981 |
| 21 | 2.041 | 0.818 | 0.834*** | 0.981 |
| 22 | 2.126 | 0.798 | 0.843*** | 0.981 |
| 23 | 2.166 | 0.788 | 0.864*** | 0.981 |
| 24 | 2.177 | 0.806 | 0.862*** | 0.981 |
| 25 | 2.306 | 0.754 | 0.880*** | 0.980 |
| 26 | 2.303 | 0.748 | 0.882*** | 0.980 |

Footnote：***represents *P*<0.001, SD represents standard deviation. Correlation coefficient analysis Dispersion degree analysis showed The SD of item 26 is 0.748, which is below 0.75, suggested to deleted.

**Supplementary Table 9**

The Results of Critical Ratio Method（n=271）.

| Item | *t* | *P* | Item | *t* | *P* |
| --- | --- | --- | --- | --- | --- |
| 1 | 27.537 | <0.001 | 14 | 25.934 | <0.001 |
| 2 | 26.473 | <0.001 | 15 | 24.236 | <0.001 |
| 3 | 23.333 | <0.001 | 16 | 22.569 | <0.001 |
| 4 | 22.753 | <0.001 | 17 | 19.041 | <0.001 |
| 5 | 29.789 | <0.001 | 18 | 21.859 | <0.001 |
| 6 | 35.443 | <0.001 | 19 | 19.368 | <0.001 |
| 7 | 24.368 | <0.001 | 20 | 21.298 | <0.001 |
| 8 | 24.769 | <0.001 | 21 | 19.959 | <0.001 |
| 9 | 24.368 | <0.001 | 22 | 17.848 | <0.001 |
| 10 | 18.449 | <0.001 | 23 | 18.657 | <0.001 |
| 11 | 17.473 | <0.001 | 24 | 20.958 | <0.001 |
| 12 | 21.012 | <0.001 | 25 | 20.027 | <0.001 |
| 13 | 24.241 | <0.001 | 26 | 18.742 | <0.001 |

Footnote: All items met the standard of *P*<0.01. All the items can be kept by critical ratio method.

Supplementary Table 10

Kaiser-Meyer-Olkin Test and Bartlett Tests（n=271）.

| Test | Statistic | Value |
| --- | --- | --- |
| Kaiser-Meyer-Olkin (KMO) test |  | 0.954 |
| Bartlett's sphere test | χ2 | 10425.465 |
|  | df | 325 |
|  | *P* | <0.001 |

Footnote: The KMO value is 0.954 which is not less than 0.6, and the result of Bartlett's sphere test is *P*<0.001, suggesting that the questionnaire is suitable for exploratory factor analysis.

Supplementary Table 11

Factor Loading of the Questionnaire（n=271）.

| Item | Factor1 | Factor 2 | Factor 3 | Common factor variance |
| --- | --- | --- | --- | --- |
| 7 | **0.593** | 0.485 | 0.261 | 0.762 |
| 8 | **0.621** | 0.573 | 0.279 | 0.793 |
| 9 | **0.617** | 0.579 | 0.287 | 0.798 |
| 10 | **0.548** | 0.449 | 0.340 | 0.718 |
| 14 | **0.771** | 0.368 | 0.259 | 0.797 |
| 15 | **0.786** | 0.337 | 0.277 | 0.808 |
| 16 | **0.828** | 0.277 | 0.315 | 0.862 |
| 17 | **0.841** | 0.288 | 0.275 | 0.865 |
| 18 | **0.794** | 0.385 | 0.185 | 0.813 |
| 19 | **0.791** | 0.431 | 0.171 | 0.840 |
| 20 | **0.685** | 0.474 | 0.184 | 0.728 |
| 1 | 0.521 | **0.703** | 0.154 | 0.789 |
| 2 | 0.516 | **0.722** | 0.160 | 0.813 |
| 3 | 0.486 | **0.662** | 0.205 | 0.717 |
| 4 | 0.184 | **0.709** | 0.462 | 0.750 |
| 5 | 0.298 | **0.742** | 0.316 | 0.739 |
| 6 | 0.282 | **0.796** | 0.328 | 0.820 |
| 21 | 0.552 | **0.604** | 0.224 | 0.720 |
| 22 | 0.551 | **0.583** | 0.285 | 0.725 |
| 23 | 0.525 | **0.628** | 0.310 | 0.766 |
| 24 | 0.535 | 0.620 | 0.301 | 0.761 |
| 25 | 0.551 | 0.652 | 0.266 | 0.799 |
| 26 | 0.558 | 0.635 | 0.286 | 0.796 |
| 11 | 0.302 | 0.305 | 0.811 | 0.842 |
| 12 | 0.162 | 0.242 | 0.844 | 0.798 |
| 13 | 0.346 | 0.274 | 0.796 | 0.828 |

Footnote: The bold values indicate the item belong to the factor in this column. Any item with a factor loading<0.4 or the factors in two domains >0.4 was eliminated. The loading of Item 22 in factor 1and factor 2 was close, which should consider to eliminated.

Supplementary Table 12

The Results of Item Selection.

| Item | Correlation coefficient analysis | Dispersion degree analysis | Cronbach's α coefficient method | Critical ratio method | Exploratory factor analysis | Expert’s suggestion | Final  Decision |
| --- | --- | --- | --- | --- | --- | --- | --- |
| 1 | ☆ | ☆ | ☆ | ☆ | ☆ | ☆ | Keep |
| 2 | ☆ | ☆ | ☆ | ☆ | ☆ | ☆ | Keep |
| 3 | ☆ | ☆ | ☆ | ☆ | ☆ | ☆ | Keep |
| 4 | ☆ | ☆ | ☆ | ☆ | ☆ | ☆ | Keep |
| 5 | ☆ | ☆ | ☆ | ☆ | ☆ | ☆ | Keep |
| 6 | ☆ | ☆ | ☆ | ☆ | ☆ | ☆ | Keep |
| 7 | ☆ | ☆ | ☆ | ☆ | ☆ | ☆ | Keep |
| 8 | ☆ | ☆ | ☆ | ☆ | ☆ | ☆ | Keep |
| 9 | ☆ | ☆ | ☆ | ☆ | ☆ | ☆ | Keep |
| 10 | ☆ | ☆ | ☆ | ☆ | ☆ | ☆ | Keep |
| 11 | ☆ | ☆ | ☆ | ☆ | ☆ | ☆ | Keep |
| 12 | ☆ | ☆ | ☆ | ☆ | ☆ | ☆ | Keep |
| 13 | ☆ | ☆ | ☆ | ☆ | ☆ | ☆ | Keep |
| 14 | ☆ | ☆ | ☆ | ☆ | ☆ | ☆ | Keep |
| 15 | ☆ | ☆ | ☆ | ☆ | ☆ | ☆ | Keep |
| 16 | ☆ | ☆ | ☆ | ☆ | ☆ | ☆ | Keep |
| 17 | ☆ | ☆ | ☆ | ☆ | ☆ | Eliminate | Eliminate |
| 18 | ☆ | ☆ | ☆ | ☆ | ☆ | Eliminate | Eliminate |
| 19 | ☆ | ☆ | ☆ | ☆ | ☆ | ☆ | Keep |
| 20 | ☆ | ☆ | ☆ | ☆ | ☆ | ☆ | Keep |
| 21 | ☆ | ☆ | ☆ | ☆ | ☆ | ☆ | Keep |
| 22 | ☆ | ☆ | ☆ | ☆ | Eliminate | ☆ | Eliminate |
| 23 | ☆ | ☆ | ☆ | ☆ | ☆ | ☆ | Keep |
| 24 | ☆ | ☆ | ☆ | ☆ | ☆ | ☆ | Keep |
| 25 | ☆ | ☆ | ☆ | ☆ | ☆ | ☆ | Keep |
| 26 | ☆ | Eliminate | ☆ | ☆ | ☆ | ☆ | Eliminate |

Footnote：☆ represents keep.

**Supplementary Table 13**

The Content Validity of the Questionnaire.

| Item | I-CVI | Item | I-CVI |
| --- | --- | --- | --- |
| 1 | 0.931 | 12 | 1.000 |
| 2 | 0.966 | 13 | 0.966 |
| 3 | 1.000 | 14 | 0.931 |
| 4 | 1.000 | 15 | 0.931 |
| 5 | 1.000 | 16 | 0.931 |
| 6 | 0.931 | 17 | 0.897 |
| 7 | 0.931 | 18 | 0.966 |
| 8 | 0.966 | 19 | 0.931 |
| 9 | 1.000 | 20 | 0.828 |
| 10 | 0.897 | 21 | 0.828 |
| 11 | 0.966 | 22 | 0.862 |
| S-CVI/Ave | 0.939 |  |  |

Supplementary Table 14

The Convergent Validity of the Questionnaire（n=623）.

| Domain | C.R. | Average Variance Extracted (AVE) |
| --- | --- | --- |
| Medical management | 0.925 | 0.698 |
| Rehabilitation exercise management | 0.880 | 0.920 |
| Daily life management | 0.981 | 0.718 |

Footnote: C.R.value = Sum (loading)^2 / [sum (loading)^2 + sum (e)]. The C.R. value >0.7 and the AVE of domains> 0.5 indicated good convergent validity.

Supplementary Table 15

The Discriminant Validity of the Questionnaire（n=623）.

| Domain | Domain1  (*r*) | Domain2  (*r*) | Domain3  (*r*) | AVE square root |
| --- | --- | --- | --- | --- |
| Medical management (Domain1) | 1 | 0.723** | 0.707** | 0.836** |
| Rehabilitation exercise management (Domain2) | 0.723** | 1 | 0.828** | 0.959** |
| Daily life management (Domain3) | 0.707** | 0.828** | 1 | 0.847** |

Footnote: *r* refers correlation coefficient. ** represents a significant correlation. The average variance extracted (AVE) square root of the domain 1 is higher than correlation coefficients between domain 1 and domain 2, higher than correlation coefficients between domain 1and domain 3, indicating the domain 1 had good discriminant validity. The resulted showed every domain had good discriminant validity.
